# Supplementary material for: Landscape Characteristics Affecting Small Mammal Occurrence in Heterogeneous Olive Grove Agro-Ecosystems
Source: MDPI journal article supplement (doi:10.3390/conservation2010005), 2022-01-10
Supplement: s1 [file s1]

# Landscape Characteristics Affecting Small Mammal Occurrence in Heterogeneous Olive Grove Agro-Ecosystems

**Table S1.** Support for the effects of each landscape variable alone on Cabrera and Lusitanian pine voles occupancy relative to the model with constant occupancy ( $Psi \sim 1$ ), while keeping detectability as a function of transect location ( $p \sim TransType$ ) (see Table 1). AICc scores of models with constant occupancy were 529.13 and 261.33 for the Cabrera and Lusitanian vole, respectively. Supported effects are identified in bold.

| <i>Psi</i> Submodel | Cabrera vole  |             |         | Lusitanian pine vole |             |             |
|---------------------|---------------|-------------|---------|----------------------|-------------|-------------|
|                     | AICc          | DeltaAICc   | Wt-AICc | AICc                 | DeltaAICc   | Wt-AICc     |
| Cover metrics       |               |             |         |                      |             |             |
| ~OliveCover         | 530.99        | −1.86       | 0.28    | 262.76               | −1.42       | 0.33        |
| ~PastCover          | 531.45        | −2.32       | 0.24    | <b>260.76</b>        | <b>0.57</b> | <b>0.57</b> |
| ~ShrubCover         | 531.35        | −2.22       | 0.25    | 262.68               | −1.34       | 0.34        |
| ~AgricCover         | <b>528.11</b> | <b>1.03</b> | 0.63    | 262.68               | −1.34       | 0.34        |
| ~ForestCover        | 531.49        | −2.36       | 0.24    | 263.60               | −2.26       | 0.24        |
| Edge metrics        |               |             |         |                      |             |             |
| ~OliveEdgeD         | 530.27        | −1.13       | 0.36    | 262.81               | −1.48       | 0.32        |
| ~PastEdgeD          | 531.18        | −2.05       | 0.26    | <b>260.29</b>        | <b>1.04</b> | <b>0.63</b> |
| ~ShrubEdgeD         | 531.46        | −2.33       | 0.24    | 262.80               | −1.47       | 0.32        |
| ~AgricEdgeD         | <b>527.25</b> | <b>1.88</b> | 0.72    | 263.65               | −2.32       | 0.24        |
| ~ForestEdgeD        | 531.36        | −2.23       | 0.25    | 262.86               | −1.52       | 0.32        |
| Density metrics     |               |             |         |                      |             |             |
| ~OlivePatchD        | 530.27        | −1.13       | 0.36    | 263.69               | −2.35       | 0.24        |
| ~PastPatchD         | 531.28        | −2.14       | 0.26    | <b>258.28</b>        | <b>3.05</b> | <b>0.82</b> |
| ~ShrubPatchD        | 531.46        | −2.33       | 0.24    | 263.32               | −1.98       | 0.27        |
| ~AgricPatchD        | <b>526.91</b> | <b>2.22</b> | 0.75    | 263.48               | −2.15       | 0.25        |
| ~ForestPatchD       | 531.35        | −2.22       | 0.25    | 263.24               | −1.91       | 0.28        |
| Aggregation metrics |               |             |         |                      |             |             |
| ~OliveNLSI          | 530.71        | −1.57       | 0.31    | <b>259.57</b>        | <b>1.76</b> | <b>0.71</b> |
| ~PastNLSI           | <b>528.35</b> | <b>0.78</b> | 0.60    | 264.96               | −3.62       | 0.14        |
| ~ShrubNLSI          | 530.86        | −1.72       | 0.30    | 261.69               | −0.36       | 0.46        |
| ~AgricNLSI          | <b>528.08</b> | <b>1.05</b> | 0.63    | 262.04               | −0.70       | 0.41        |
| ~ForestNLSI         | 531.49        | −2.36       | 0.24    | <b>261.20</b>        | <b>0.13</b> | <b>0.52</b> |
| Diversity metrics   |               |             |         |                      |             |             |
| ~PatchRichness      | 530.56        | −1.43       | 0.33    | 263.39               | −2.05       | 0.26        |
| ~ShanDiv            | 530.40        | −1.26       | 0.35    | 263.00               | −1.67       | 0.30        |
| ~ShanEvn            | 531.11        | −1.98       | 0.27    | 262.93               | −1.59       | 0.31        |

**Table S2.** Pearson’s correlations among covariates receiving some support regarding their effects on Cabrera vole occupancy. Correlations >0.6 or <−0.6 are indicated in bold, and from each of the corresponding pair of variables only the one yielding the lower AICc in single covariate occupancy models was retained in subsequent analyses (see main text).

|             | AgricCover  | AgricEdgeD  | AgricPatchD | AgicNLSI | PastNLSI |
|-------------|-------------|-------------|-------------|----------|----------|
| AgricCover  | 1           |             |             |          |          |
| AgricEdgeD  | <b>0.89</b> | 1           |             |          |          |
| AgricPatchD | <b>0.72</b> | <b>0.88</b> | 1           |          |          |
| AgricNLSI   | 0.18        | 0.36        | 0.46        | 1        |          |
| PastNLSI    | 0.49        | 0.48        | 0.25        | 0.06     | 1        |

**Table S3.** Pearson’s correlations among covariates receiving some support regarding their effects on Lusitanian pine vole occupancy. Correlations >0.6 or <−0.6 are indicated in bold, and from each of the corresponding pair of variables only the one yielding the lower AICc in single covariate occupancy models was retained in subsequent analyses (see main text).

|            | PastCover   | PastEdgeD   | PastPatchD | OliveNLSI | ForestNLSI |
|------------|-------------|-------------|------------|-----------|------------|
| PastCover  | 1           |             |            |           |            |
| PastEdgeD  | <b>0.80</b> | 1           |            |           |            |
| PastPatchD | <b>0.69</b> | <b>0.87</b> | 1          |           |            |
| OliveNLSI  | −0.22       | −0.23       | −0.21      | 1         |            |
| ForestNLSI | 0.17        | 0.19        | 0.04       | −0.10     | 1          |

**Table S4.** Alternative versions of the full model for each species, accounting for those covariates that were highly correlated and therefore may not be included in the same model. In each case the model indicated in bold was the alternative with lower AICc scores, and therefore was carried forward to the model building and selection procedure (see main text).

| Species              | <i>Psi</i> Submodel                              | AICc          |
|----------------------|--------------------------------------------------|---------------|
| Cabrera vole         | <b>~Agric_EdgeD + Agric_NLSI + Past_NLSI</b>     | <b>525.22</b> |
|                      | ~Agric_Cover + Agric_NLIS + Past_NLSI            | 527.25        |
|                      | ~Agric_Patch_D + Agric_NLSI + Past_NLSI          | 528.03        |
| Lusitanian pine vole | <b>~ Past_Patch_D + Forest_NLSI + Olive_NLSI</b> | <b>259.31</b> |
|                      | ~ Past_Cover + Forest_NLSI + Olive_NLSI          | 261.84        |
|                      | ~ Past_EdgeD+ Forest_NLSI + Olive_NLSI           | 261.53        |
